# Supplementary material for: Synthesis of diketopyrrolopyrrole based copolymers via the direct arylation method for p-channel and ambipolar OFETs
Source: Royal Society of Chemistry journal article supplement (doi:10.1039/c3cp53641f), 2014-01-01
Supplement: c3cp53641f.pdf [file c3cp53641f.pdf]

## **Supplementary Information**

### **Synthesis of Diketopyrrolopyrrole Based Copolymers via Direct Arylation Method for p-Channel and Ambipolar OFETs**

**Prashant Sonar,<sup>\*a</sup> Thelese Ru Bao Foong<sup>a</sup>, Ananth Dodabalapur<sup>\*a,b</sup>**

a. Institute of Materials Research and Engineering (IMRE), Agency for Science, Technology, and Research (A\*STAR), 3 Research Link, Singapore 117602

b. Microelectronics Research Centre, The University of Texas at Austin, Austin, TX, 78758, USA

Email: [sonarp@imre.a-star.edu.sg](mailto:sonarp@imre.a-star.edu.sg), [ananth.dodabalapur@engr.utexas.edu](mailto:ananth.dodabalapur@engr.utexas.edu)

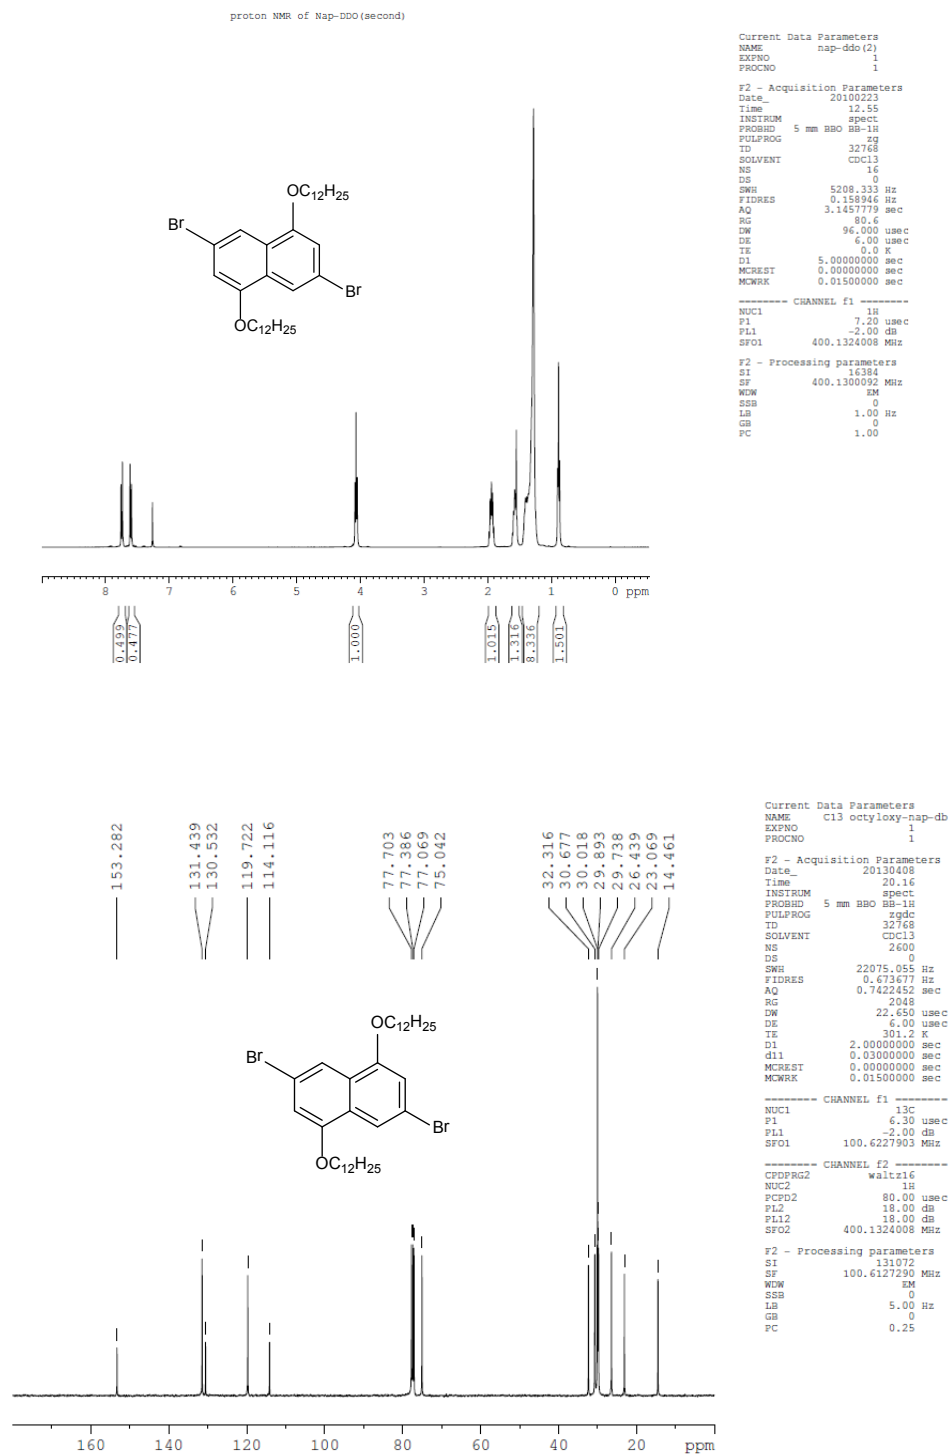

**Figure S1.**  $^1\text{H}$  and  $^{13}\text{C}$  NMR spectrum of 3,7-dibromo-1,5-bis(dodecyloxy)naphthalene in  $\text{CDCl}_3$ .

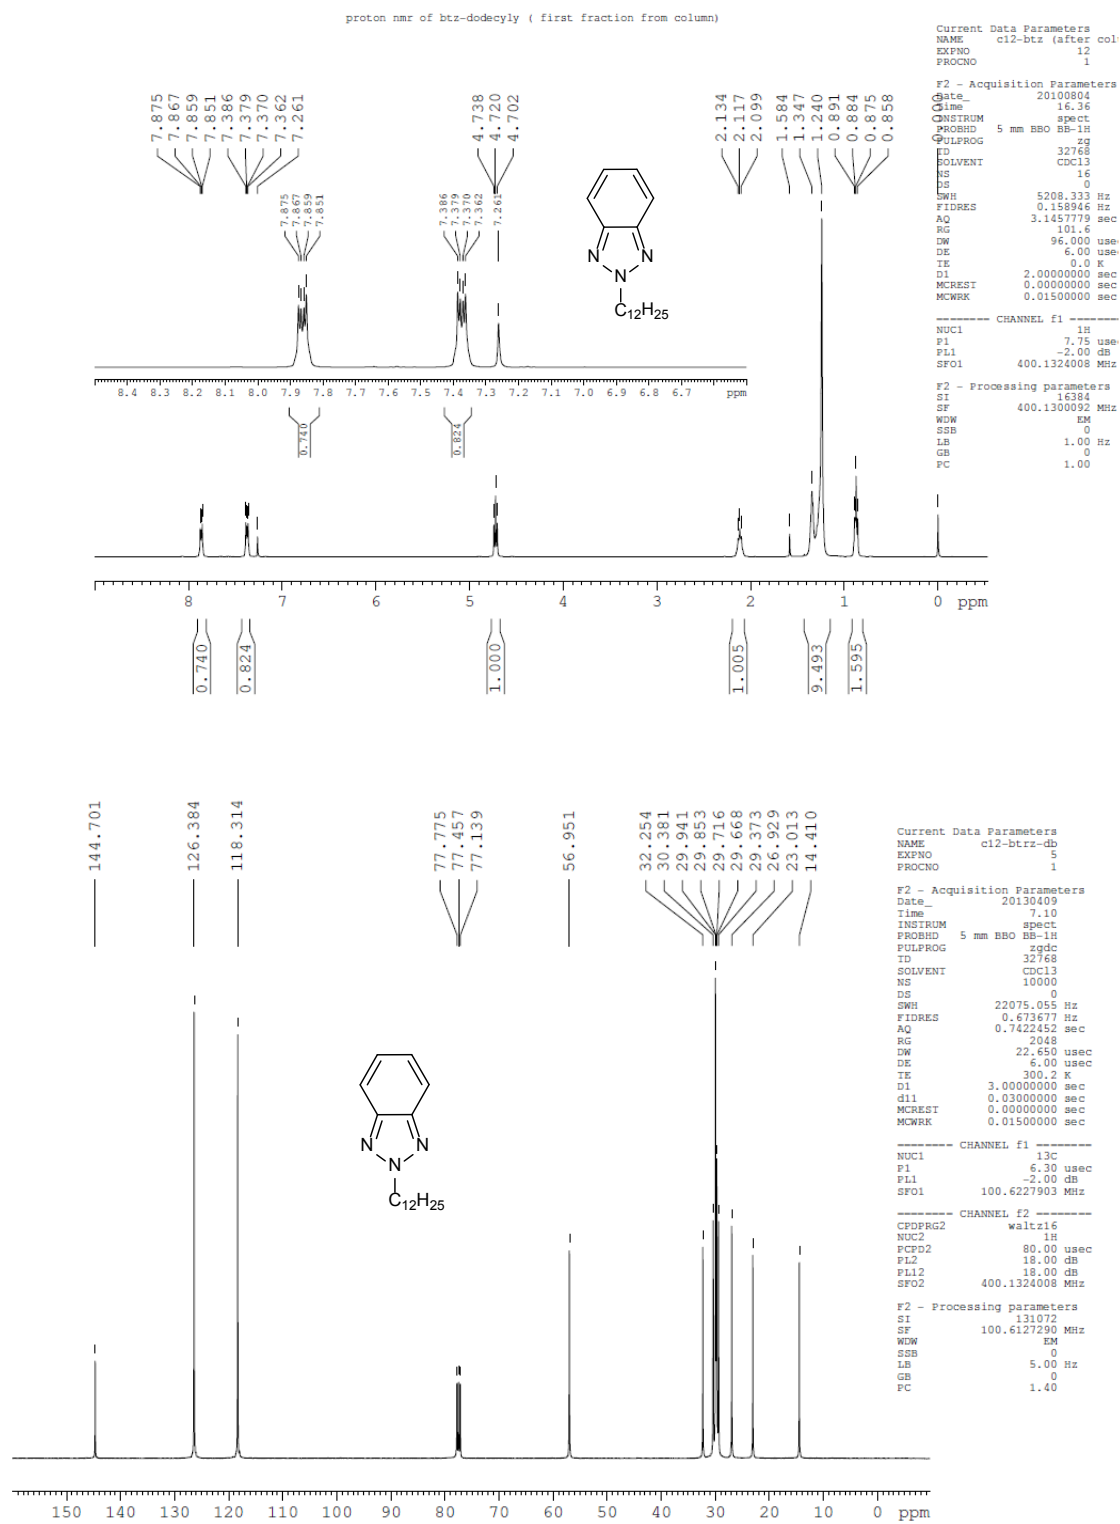

**Figure S2.** <sup>1</sup>H and <sup>13</sup>C NMR spectrum of 2-dodecyl-2H-benzotriazole in CDCl<sub>3</sub>.

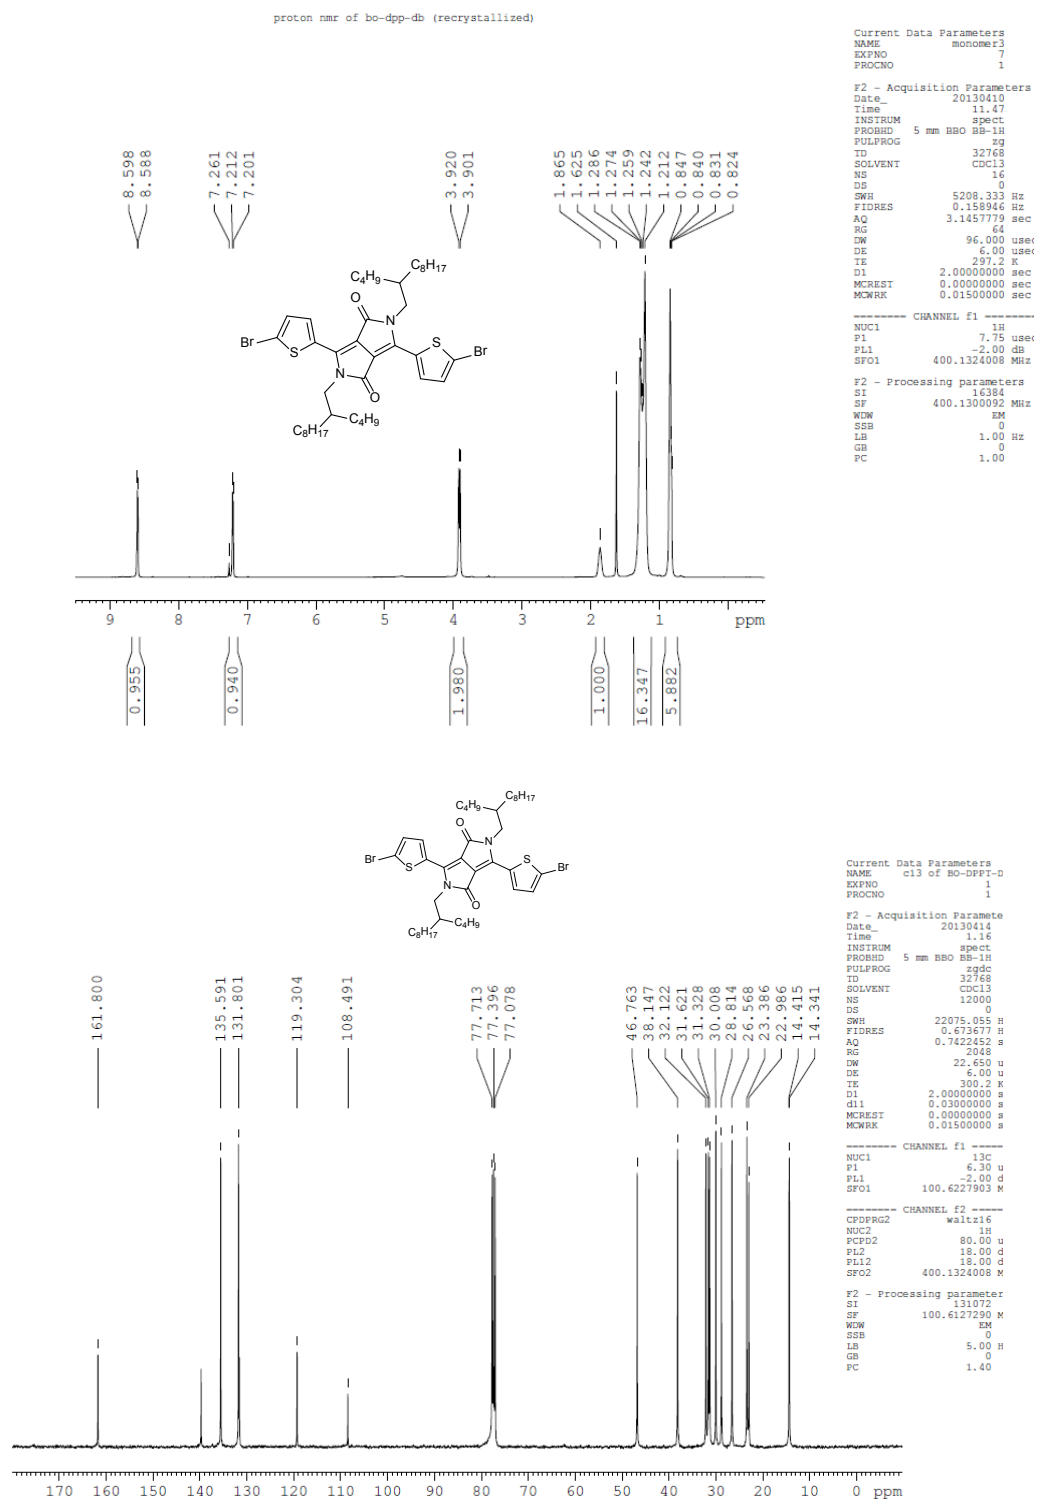

**Figure S3.** <sup>1</sup>H and <sup>13</sup>C NMR spectrum of 3,6-bis(5-bromothiophen-2-yl)-2,5-bis(2-butyldecyl)pyrrolo[3,4-c]pyrrole-1,4(2H,5H)-dione in CDCl<sub>3</sub>.

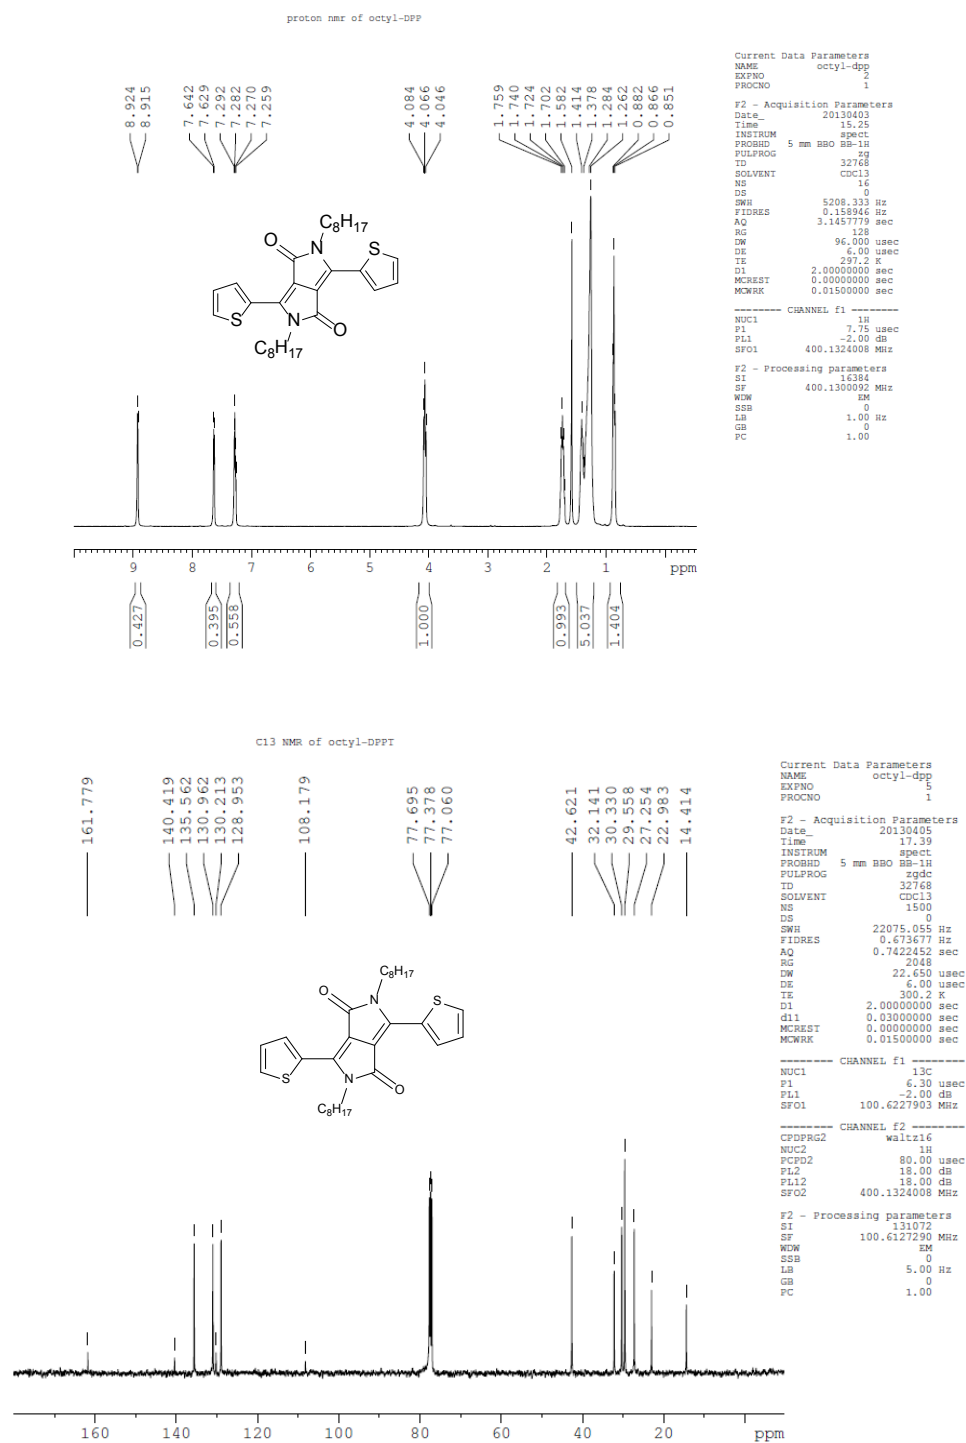

**Figure S4.** <sup>1</sup>H and <sup>13</sup>C NMR spectrum of 2,5-dioctyl-3,6-di(thiophen-2-yl)pyrrolo[3,4-c]pyrrole-1,4(2H,5H)-dione in CDCl<sub>3</sub>.

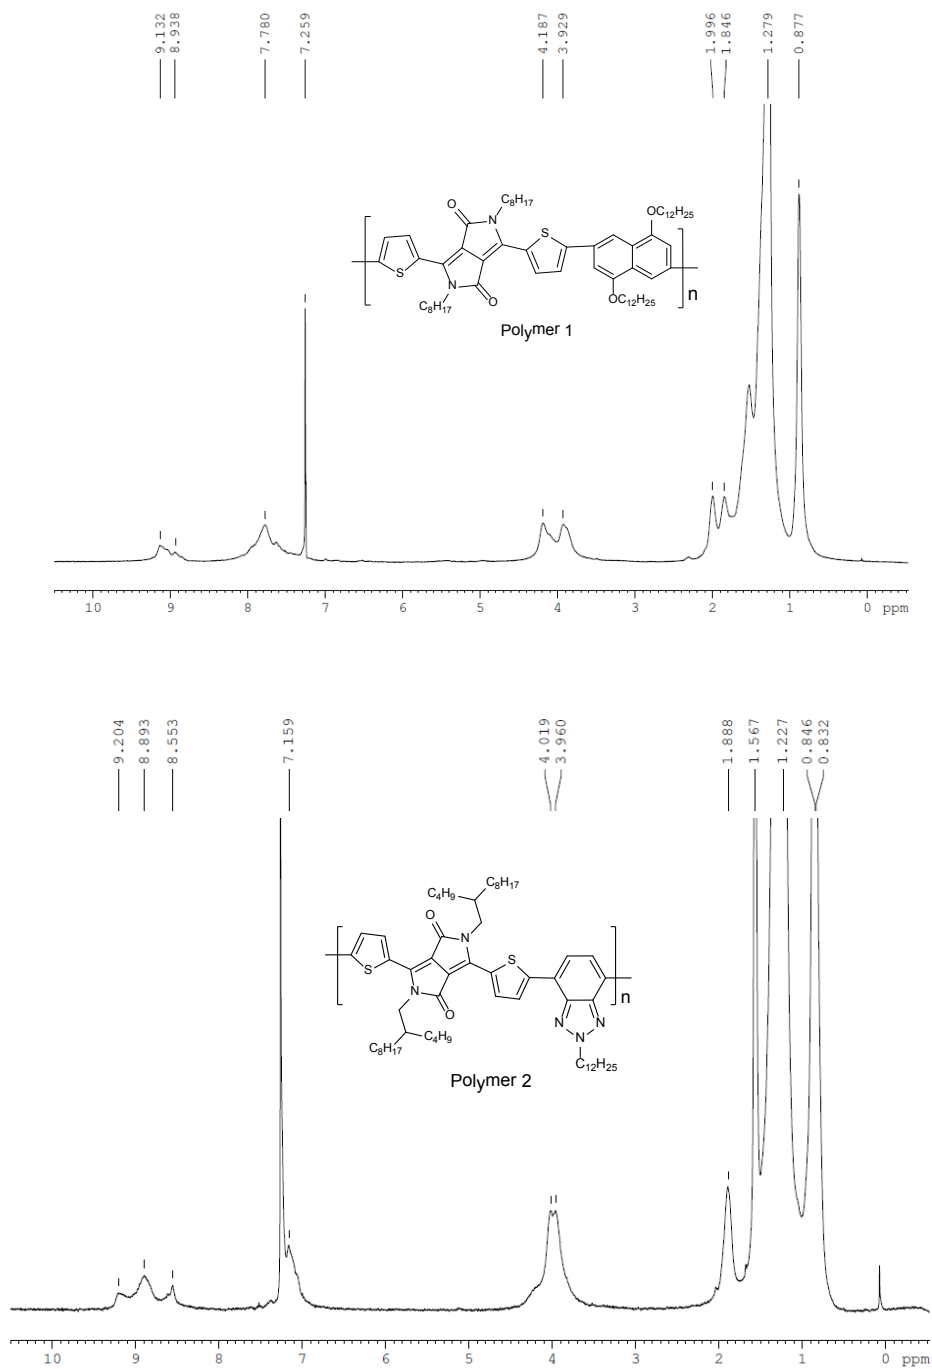

**Figure S5.**  $^1\text{H}$  NMR spectra of **PDPPT-NAP** and **PDPPT-BTRZ** polymers.

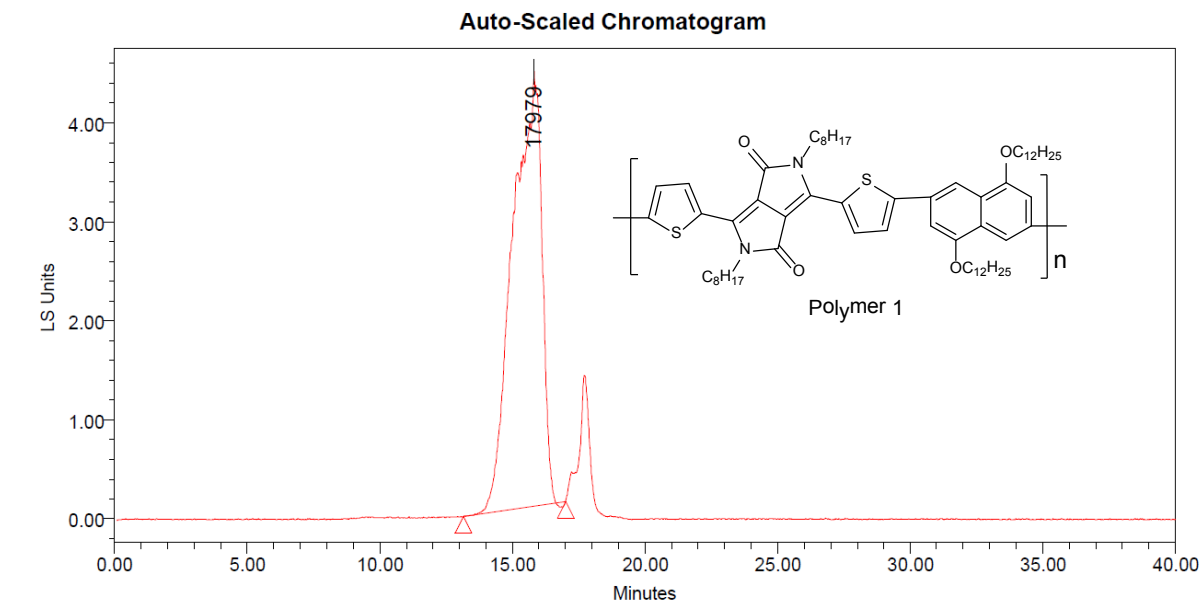

**GPC Results**

|   | Mn    | Mw    | MP    | Mz    | Mz+1  | Polydispersity |
|---|-------|-------|-------|-------|-------|----------------|
| 1 | 23402 | 34645 | 17979 | 53328 | 78877 | 1.480409       |

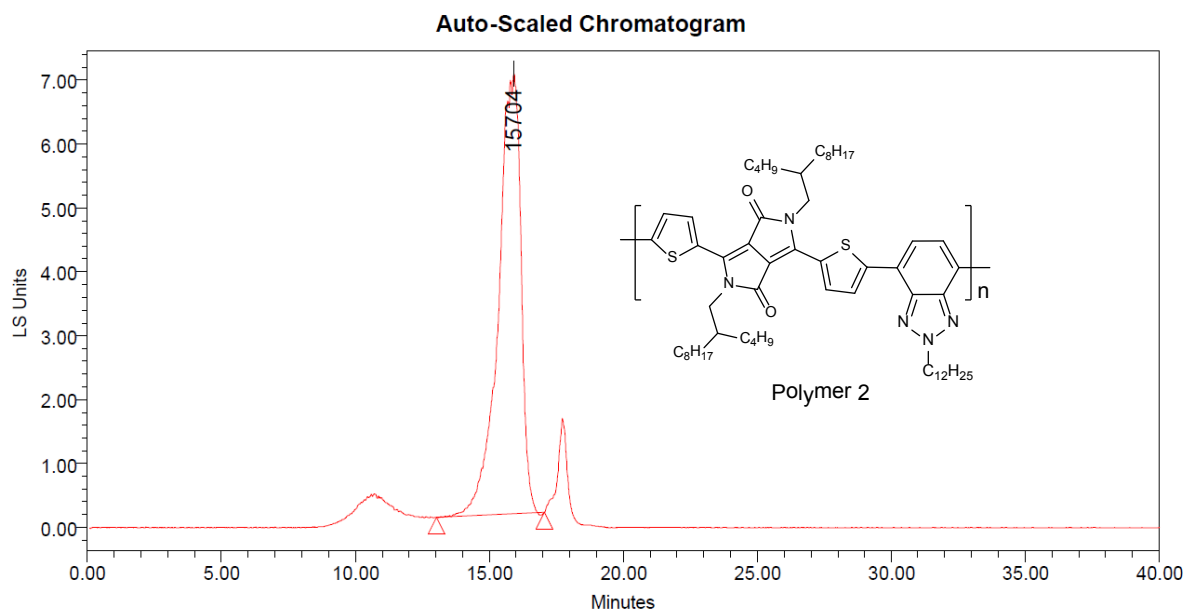

**GPC Results**

|   | Mn    | Mw    | MP    | Mz    | Mz+1  | Polydispersity |
|---|-------|-------|-------|-------|-------|----------------|
| 1 | 18639 | 25731 | 15704 | 45029 | 97548 | 1.380492       |

**Figure S6.** Gel Permeation Chromatogram (GPC) spectra of **PDPPT-NAP** and **PDPPT-BTRZ** polymers.

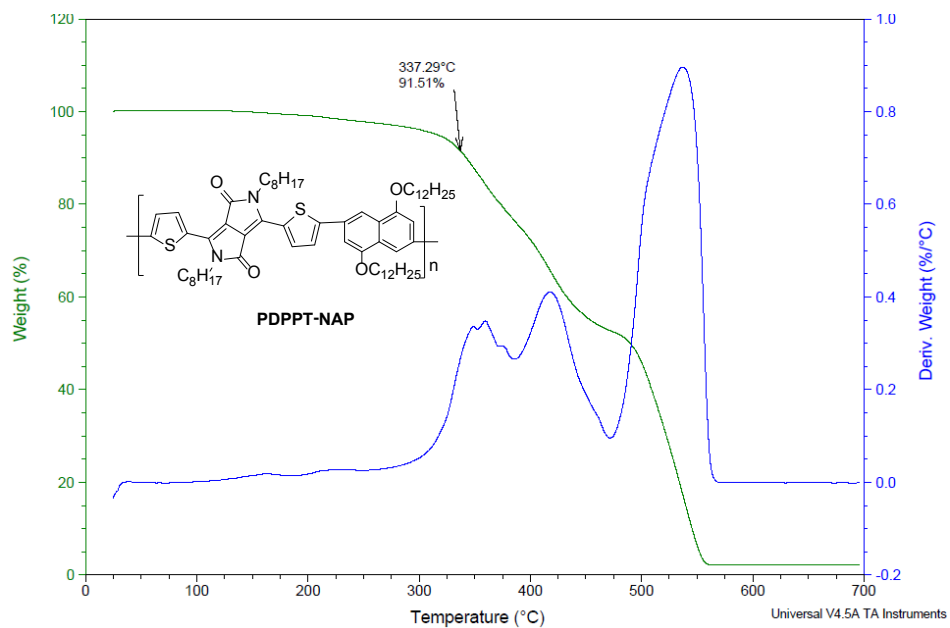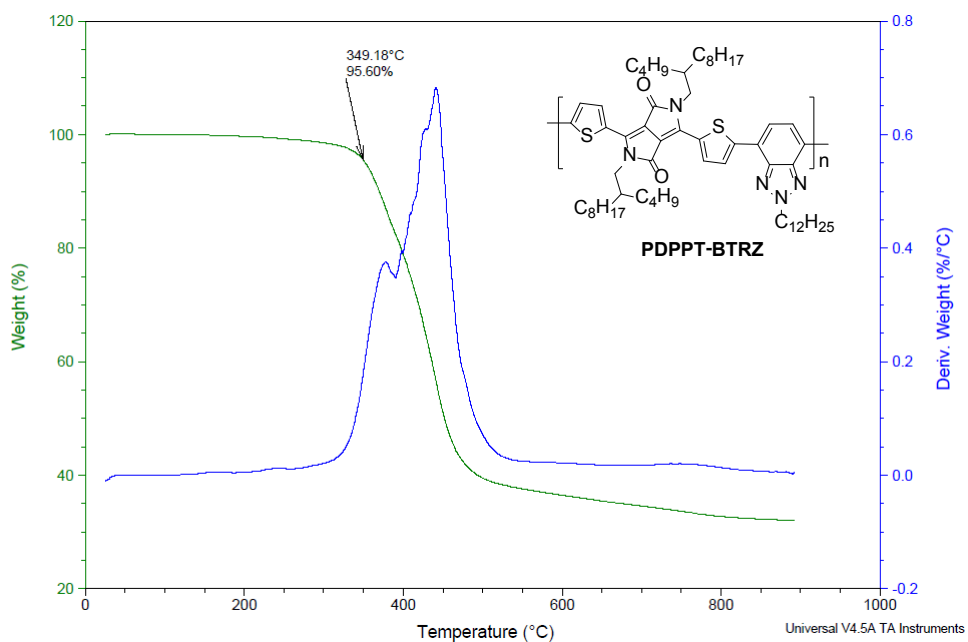

**Figure S7.** Thermo gravimetric analysis (TGA) graphs of **PDPPT-NAP** and **PDPPT-BTRZ** polymers.
